# Supplementary material
Source: PubMed Central journal article supplement (PMC9630154)
Supplement: mmc1.pdf [file mmc1.pdf]

## APPENDIX A. Survey wording for web-based surveys

| Question                                        | Online KPSEM survey                                                                                                                                                                                                                                                                                                   | Timing                                    |
|-------------------------------------------------|-----------------------------------------------------------------------------------------------------------------------------------------------------------------------------------------------------------------------------------------------------------------------------------------------------------------------|-------------------------------------------|
| Survey Q1: Prior COVID-19 status                | Have you ever had a positive COVID-19 test or been told by a health care provider that you had COVID-19?<br>[Check boxes - Yes & No - automatically continues to next page]                                                                                                                                           | Day 1 (first ever survey)                 |
| Survey Q2: Local reactions                      | Since getting your COVID-19 vaccine, have you experienced any of the following side effects at or near where you got the shot? Please select all that apply. [Check boxes - Pain, Redness, Itching, Swelling, No symptoms]                                                                                            | Days:<br>1,2,3,4,5,6,7,8,10,12,14         |
| Survey Q3: Systemic reactions I                 | Since getting your COVID-19 vaccine, have you experienced any of the following side effects? Please select all that apply. Check boxes - [Fever, Chills, Fatigue or tiredness, Joint pain or body or muscle aches, Headache, Nausea or vomiting, Rash (not including injection site), No symptoms]                    | Days:<br>1,2,3,4,5,6,7,8,10,12,14,        |
| Survey Q4: Systemic reactions II                | Since getting your COVID-19 vaccine, have you experienced any of the following side effects? Please select all that apply. [Check boxes - Persistent fast heart rate, Lightheadedness Painful, burning, or tingling rash (shingles); Menstrual cycle changes, if applicable; Chest pain; Other symptoms; No symptoms] | Days:<br>1,2,3,4,5,6,7,8,10,12,14, 21, 35 |
| Survey Q5: Medical care (if yes to previous Qs) | Did any of these symptoms cause you to seek medical care?<br>[Check boxes - Yes & No - automatically continues to next question]                                                                                                                                                                                      | Days:<br>1,2,3,4,5,6,7,8,10,12,14, 21, 35 |

KPSEM = Kaiser Permanente Side Effect Monitor

## APPENDIX B. ICD-10 codes used to categorize selected post-vaccine symptoms

| Symptom category                 | Diagnosis description                                                               | ICD-10 code |
|----------------------------------|-------------------------------------------------------------------------------------|-------------|
| Fatigue or tiredness             | Chronic fatigue, unspecified                                                        | R53.82      |
| Fatigue or tiredness             | Muscle weakness                                                                     | M62.81      |
| Fatigue or tiredness             | Other fatigue                                                                       | R53.83      |
| Fatigue or tiredness             | Other malaise                                                                       | R53.81      |
| Fatigue or tiredness             | Post-viral fatigue syndrome (Myalgic encephalomyelitis)                             | G93.3       |
| Fatigue or tiredness             | Somnolence                                                                          | R40.0       |
| Fatigue or tiredness             | Weakness                                                                            | R53.1       |
| Fatigue or tiredness             | Difficulty in walking, not elsewhere classified                                     | R28.2       |
| Fatigue or tiredness             | Immobility (bedfast, chairfast)                                                     | R26.3       |
| Fatigue or tiredness             | Other and unspecified abnormalities of gait and mobility (unsteadiness on feet NOS) | R26.8       |
| Fatigue or tiredness             | Other and unspecified lack of coordination                                          | R27.8       |
| Fatigue or tiredness             | Repeated falls                                                                      | R27.9       |
| Fatigue or tiredness             | Unsteadiness on feet                                                                | R26.81      |
| Chills                           | Chills (without fever)                                                              | R68.83      |
| Joint pain, muscle or body aches | Arthralgia                                                                          | M25.5       |
| Joint pain, muscle or body aches | Facial weakness                                                                     | R29.810     |
| Joint pain, muscle or body aches | Fibromyalgia                                                                        | M79.7       |
| Joint pain, muscle or body aches | Inflammatory polyarthritis                                                          | M06.4       |
| Joint pain, muscle or body aches | Inflammatory polyneuropathy                                                         | G61         |
| Joint pain, muscle or body aches | Joint pain                                                                          | M25.50      |
| Joint pain, muscle or body aches | Musculoskeletal pain                                                                | M79.18      |
| Joint pain, muscle or body aches | Myalgia                                                                             | M79.10      |
| Joint pain, muscle or body aches | Other reactive arthropathies, left ankle and foot                                   | M02.872     |
| Joint pain, muscle or body aches | Other reactive arthropathies, left elbow                                            | M02.822     |
| Joint pain, muscle or body aches | Other reactive arthropathies, left hand                                             | M02.842     |
| Joint pain, muscle or body aches | Other reactive arthropathies, left hip                                              | M02.852     |
| Joint pain, muscle or body aches | Other reactive arthropathies, left knee                                             | M02.862     |
| Joint pain, muscle or body aches | Other reactive arthropathies, left shoulder                                         | M02.812     |
| Joint pain, muscle or body aches | Other reactive arthropathies, left wrist                                            | M02.832     |
| Joint pain, muscle or body aches | Other reactive arthropathies, multiple sites                                        | M02.89      |
| Joint pain, muscle or body aches | Other reactive arthropathies, right ankle and foot                                  | M02.871     |
| Joint pain, muscle or body aches | Other reactive arthropathies, right elbow                                           | M02.821     |
| Joint pain, muscle or body aches | Other reactive arthropathies, right hand                                            | M02.841     |
| Joint pain, muscle or body aches | Other reactive arthropathies, right hip                                             | M02.851     |
| Joint pain, muscle or body aches | Other reactive arthropathies, right knee                                            | M02.861     |
| Joint pain, muscle or body aches | Other reactive arthropathies, right shoulder                                        | M02.811     |
| Joint pain, muscle or body aches | Other reactive arthropathies, right wrist                                           | M02.831     |
| Joint pain, muscle or body aches | Other reactive arthropathies, unspecified ankle and foot                            | M02.879     |
| Joint pain, muscle or body aches | Other reactive arthropathies, unspecified elbow                                     | M02.829     |
| Joint pain, muscle or body aches | Other reactive arthropathies, unspecified hand                                      | M02.849     |
| Joint pain, muscle or body aches | Other reactive arthropathies, unspecified hip                                       | M02.859     |
| Joint pain, muscle or body aches | Other reactive arthropathies, unspecified knee                                      | M02.869     |
| Joint pain, muscle or body aches | Other reactive arthropathies, unspecified shoulder                                  | M02.819     |
| Joint pain, muscle or body aches | Other reactive arthropathies, unspecified site                                      | M02.80      |
| Joint pain, muscle or body aches | Other reactive arthropathies, unspecified wrist                                     | M02.839     |
| Joint pain, muscle or body aches | Other reactive arthropathies, vertebrae                                             | M02.88      |
| Joint pain, muscle or body aches | Reactive arthropathy, unspecified                                                   | M02.9       |
| Joint pain, muscle or body aches | Rhabdomyolysis                                                                      | M62.82      |
| Joint pain, muscle or body aches | Critical illness myopathy                                                           | G72.81      |
| Joint pain, muscle or body aches | Myasthenia gravis and other myoneural disorders                                     | G70*        |
| Joint pain, muscle or body aches | Myopathy, unspecified                                                               | G72.9       |
| Joint pain, muscle or body aches | Myositis                                                                            | M60.9       |
| Joint pain, muscle or body aches | Other specified myopathies                                                          | G72.89      |
| Joint pain, muscle or body aches | Primary disorders of muscle, unspecified                                            | G71.9       |
| Fever                            | Fever of other and unknown origin                                                   | R50         |
| Fever                            | Fever presenting with conditions classified elsewhere                               | R50.81      |
| Fever                            | Fever, unspecified                                                                  | R50.9       |
| Fever                            | Other specified fever                                                               | R50.8       |
| Headache                         | Cervicogenic headache                                                               | R51         |
| Headache                         | Cluster headache and other trigeminal autonomic cephalgias                          | G44.0       |
| Headache                         | Complicated headache syndromes                                                      | G44.5       |

|                          |                                                                                         |         |
|--------------------------|-----------------------------------------------------------------------------------------|---------|
| Headache                 | Daily new persistent headache                                                           | G44.52  |
| Headache                 | Drug-induced headache, not elsewhere classified                                         | G44.4   |
| Headache                 | Headache with orthostatic component                                                     | R51.0   |
| Headache                 | Headache, unspecified                                                                   | R51.9   |
| Headache                 | Migraine                                                                                | G43*    |
| Headache                 | Other headache syndromes                                                                | G44*    |
| Headache                 | Tension headache                                                                        | G44.209 |
| Headache                 | Vascular headache, not elsewhere specified                                              | G44.1   |
| Nausea                   | Nausea                                                                                  | R11.0   |
| Nausea                   | Nausea with vomiting, unspecified                                                       | R11.2   |
| Nausea                   | Vomiting without nausea                                                                 | R11.11  |
| Nausea                   | Vomiting, unspecified                                                                   | R11.10  |
| Nausea                   | Change in bowel habit                                                                   | R19.4   |
| Nausea                   | Other noninfective gastroenteritis and colitis                                          | K52*    |
| Nausea                   | Constipation                                                                            | K59*    |
| Nausea                   | Diarrhea                                                                                | R19.7   |
| Nausea                   | Functional disorder of GI tract                                                         | K92.9   |
| Nausea                   | Irritable bowel syndrome                                                                | K58*    |
| Nausea                   | Other specified symptoms and signs involving the digestive system and abdomen           | R19.8   |
| Nausea                   | Unspecified abdominal pain                                                              | R109    |
| Nausea                   | Periumbilical pain                                                                      | R1033   |
| Nausea                   | Noninfective gastroenteritis and colitis, unspecified.                                  | K529    |
| Rash, not injection site | Changes in skin texture                                                                 | R23.4   |
| Rash, not injection site | Dermatitis                                                                              | L30.9   |
| Rash, not injection site | Dermatosis                                                                              | L98.9   |
| Rash, not injection site | Other and unspecified skin changes                                                      | R23.8   |
| Rash, not injection site | Rash and other nonspecific skin eruption                                                | R21     |
| Rash, not injection site | Raynaud's syndrome                                                                      | I73.00  |
| Rash, not injection site | Spontaneous ecchymoses                                                                  | R23.3   |
| Rash, not injection site | Exfoliation due to erythematous conditions according to extent of body surface involved | L49*    |
| Rash, not injection site | Urticaria                                                                               | L50*    |
| Rash, not injection site | Erythema multiforme                                                                     | L51*    |
| Rash, not injection site | Erythema nodosum                                                                        | L52*    |
| Rash, not injection site | Other erythematous conditions                                                           | L53*    |
| Rash, not injection site | Erythema in diseases classified elsewhere                                               | L54*    |
| Rash, not injection site | Erythematous condition, unspecified.                                                    | L53.9   |
| Rash, not injection site | Urticaria                                                                               | L50*    |
| Rash, not injection site | Other pruritus                                                                          | L29.8   |
| Rash, not injection site | Pruritus, unspecified                                                                   | L29.9   |
| Rash, not injection site | Disturbances of skin sensation                                                          | R20*    |
| Rash, not injection site | Disorder of the skin and subcutaneous tissue, unspecified                               | L98.9   |
| Rash, not injection site | Pyogenic granuloma                                                                      | L98.0   |
| Rash, not injection site | Factitial dermatitis                                                                    | L98.1   |
| Rash, not injection site | Febrile neutrophilic dermatosis [Sweet]                                                 | L98.2   |
| Rash, not injection site | Eosinophilic cellulitis [Wells]                                                         | L98.3   |
| Rash, not injection site | Non-pressure chronic ulcer of skin, not elsewhere classified                            | L98.4   |
| Rash, not injection site | Mucinosis of the skin.                                                                  | L98.5   |
| Rash, not injection site | Pityriasis rosea                                                                        | L42     |
| Rash, not injection site | Other skin changes                                                                      | R23*    |
| Pre-syncope              | Disorientation, unspecified, confusion                                                  | R41.0   |
| Pre-syncope              | Dizziness and giddiness (including light headedness and Vertigo)                        | R42     |
| Pre-syncope              | Benign paroxysmal positional vertigo                                                    | H81.10  |
| Pre-syncope              | Disorders of vestibular function                                                        | H81*    |
| Pre-syncope              | Epidemic Vertigo                                                                        | A88.1   |
| Pre-syncope              | Left benign paroxysmal positional vertigo                                               | H81.12  |
| Pre-syncope              | Other peripheral vertigo                                                                | H81.3   |
| Pre-syncope              | Right benign paroxysmal positional vertigo                                              | H81.11  |
| Pre-syncope              | Vertiginous syndrome                                                                    | H81.90  |
| Pre-syncope              | Disorders of the autonomic nervous system                                               | G90     |
| Pre-syncope              | Orthostatic hypotension                                                                 | I95.1   |
| Pre-syncope              | Postural orthostatic tachycardia syndrome                                               | I49.8   |
| Pre-syncope              | Syncope                                                                                 | R55     |
| Tachycardia              | Atrial fibrillation                                                                     | I48.91  |
| Tachycardia              | Atrial fibrillation with rapid ventricular response                                     | I48.91  |
| Tachycardia              | Atrial fibrillation, paroxysmal                                                         | I48.0   |

|             |                                       |        |
|-------------|---------------------------------------|--------|
| Tachycardia | Atrial fibrillation, permanent        | I48.21 |
| Tachycardia | Atrial flutter                        | I48.92 |
| Tachycardia | Atrial premature beats                | I49.1  |
| Tachycardia | Bradycardia                           | R00.1  |
| Tachycardia | Cardiac arrhythmia                    | I49.9  |
| Tachycardia | Palpitations                          | R00.2  |
| Tachycardia | Premature ventricular beats           | I49.3  |
| <hr/>       |                                       |        |
| Chest pain  | Chest pain, unspecified               | R07.9  |
| Chest pain  | Unstable angina                       | I20.0  |
| Chest pain  | Angina pectoris with documented spasm | I20.1  |
| Chest pain  | Other forms of angina pectoris        | I20.8  |
| Chest pain  | Angina pectoris, unspecified          | I20.9  |
| Chest pain  | Atypical chest pain                   | R07.89 |
| Chest pain  | Chest pain in breathing               | R07.1  |
| Chest pain  | Chest pain, unspecified               | R07.9  |
| Chest pain  | Costochondritis                       | M94.0  |
| Chest pain  | Intercostal pain                      | R07.82 |
| Chest pain  | Other chest pain                      | R07.8  |
| Chest pain  | Pleurisy                              | R09.1  |
| Chest pain  | Pleurodynia                           | R07.81 |
| Chest pain  | Precordial pain                       | R07.2  |

\*Includes all ICD-10 codes contained within diagnosis category  
ICD= International Classification of Diseases

**APPENDIX C. Kaiser Permanente Side Effect Monitor Survey Participation**

|                                  | All vaccinated patients |        | Participation rate* |                      |        |                      |
|----------------------------------|-------------------------|--------|---------------------|----------------------|--------|----------------------|
|                                  | Dose 1                  | Dose 2 | Dose 1              |                      | Dose 2 |                      |
|                                  |                         |        |                     | P value <sup>†</sup> |        | P value <sup>†</sup> |
| <b>Total</b>                     | 79,780                  | 80,692 | 7.8%                |                      | 6.4%   |                      |
| <b>Age at vaccination, years</b> |                         |        |                     | 0.238                |        | 0.717                |
| 5                                | 10,068                  | 9,530  | 8.8%                |                      | 5.1%   |                      |
| 6                                | 10,076                  | 10,135 | 8.9%                |                      | 4.8%   |                      |
| 7                                | 10,549                  | 10,802 | 8.3%                |                      | 4.3%   |                      |
| 8                                | 11,065                  | 11,278 | 8.2%                |                      | 4.5%   |                      |
| 9                                | 12,006                  | 12,219 | 7.4%                |                      | 3.9%   |                      |
| 10                               | 12,527                  | 12,957 | 7.0%                |                      | 3.6%   |                      |
| 11                               | 13,489                  | 13,771 | 6.6%                |                      | 3.4%   |                      |
| <b>Sex</b>                       |                         |        |                     | 0.500                |        | 0.856                |
| Female                           | 39,222                  | 39,815 | 7.8%                |                      | 4.2%   |                      |
| Male                             | 40,545                  | 40,866 | 7.7%                |                      | 4.2%   |                      |
| <b>Race/Ethnicity</b>            |                         |        |                     | 0.021                |        | 0.728                |
| Hispanic                         | 34,747                  | 35,567 | 7.0%                |                      | 3.9%   |                      |
| Asian                            | 13,482                  | 13,686 | 5.9%                |                      | 3.0%   |                      |
| Black                            | 4,584                   | 4,885  | 5.8%                |                      | 3.1%   |                      |
| Other                            | 5,027                   | 5,061  | 7.4%                |                      | 4.0%   |                      |
| White                            | 16,158                  | 15,853 | 11.8%               |                      | 6.4%   |                      |
| Unknown                          | 5,782                   | 5,640  | 7.3%                |                      | 4.0%   |                      |
| <b>Insurance status</b>          |                         |        |                     | 0.021                |        | 0.499                |
| State-subsidized                 | 15,345                  | 15,753 | 6.2%                |                      | 3.2%   |                      |
| Not subsidized                   | 64,435                  | 64,939 | 8.1%                |                      | 4.4%   |                      |

\*Participants with at least one documented report via KPSEM within 14 days following receipt of vaccination/ total vaccinated population.

†Differences in participation rate were compared across demographic characteristics using chi-square tests or Fisher's exact test.

**APPENDIX D. Self-reported symptoms, by dose and week following vaccination\***

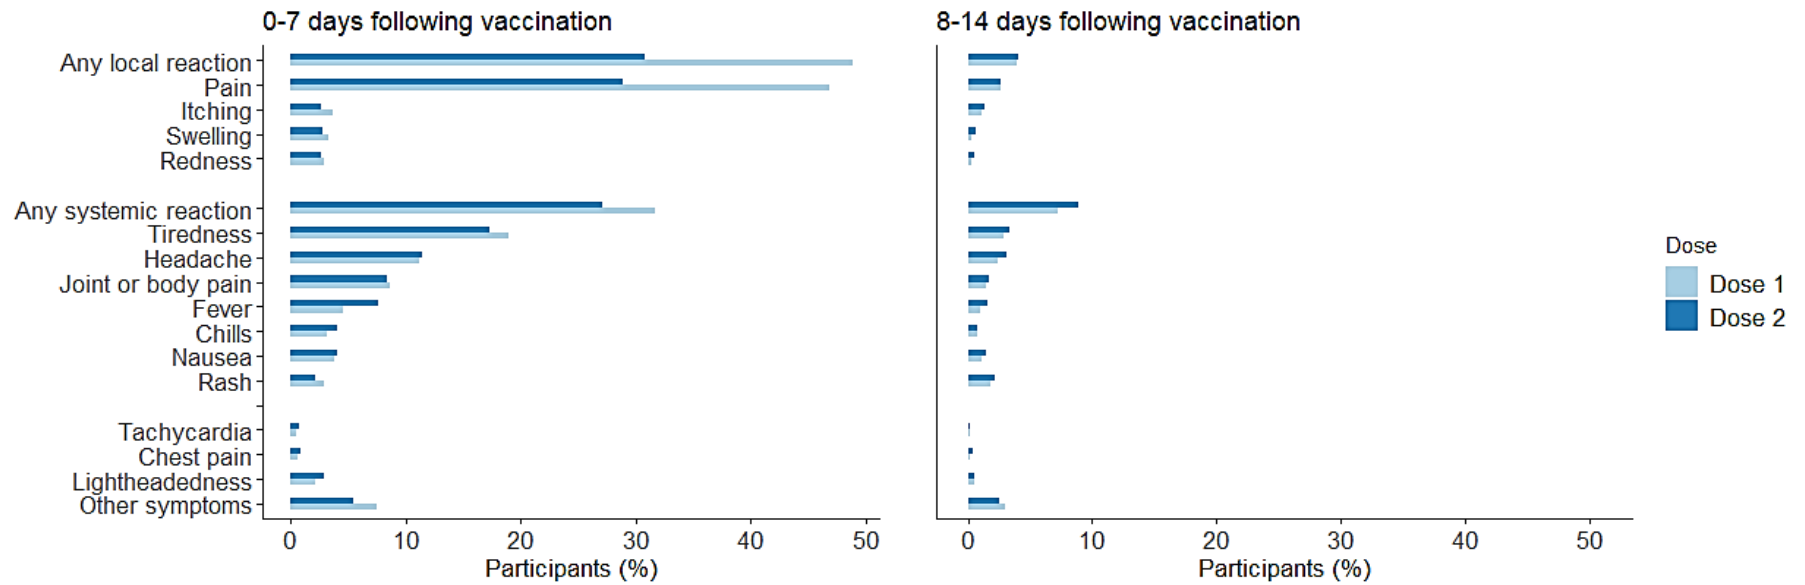

\*Denominator: All participants who have one documented report via KPSEM within 14 days following receipt of vaccination, regardless of analysis time period.

## APPENDIX E. Self-reported symptoms, by dose and day following vaccination

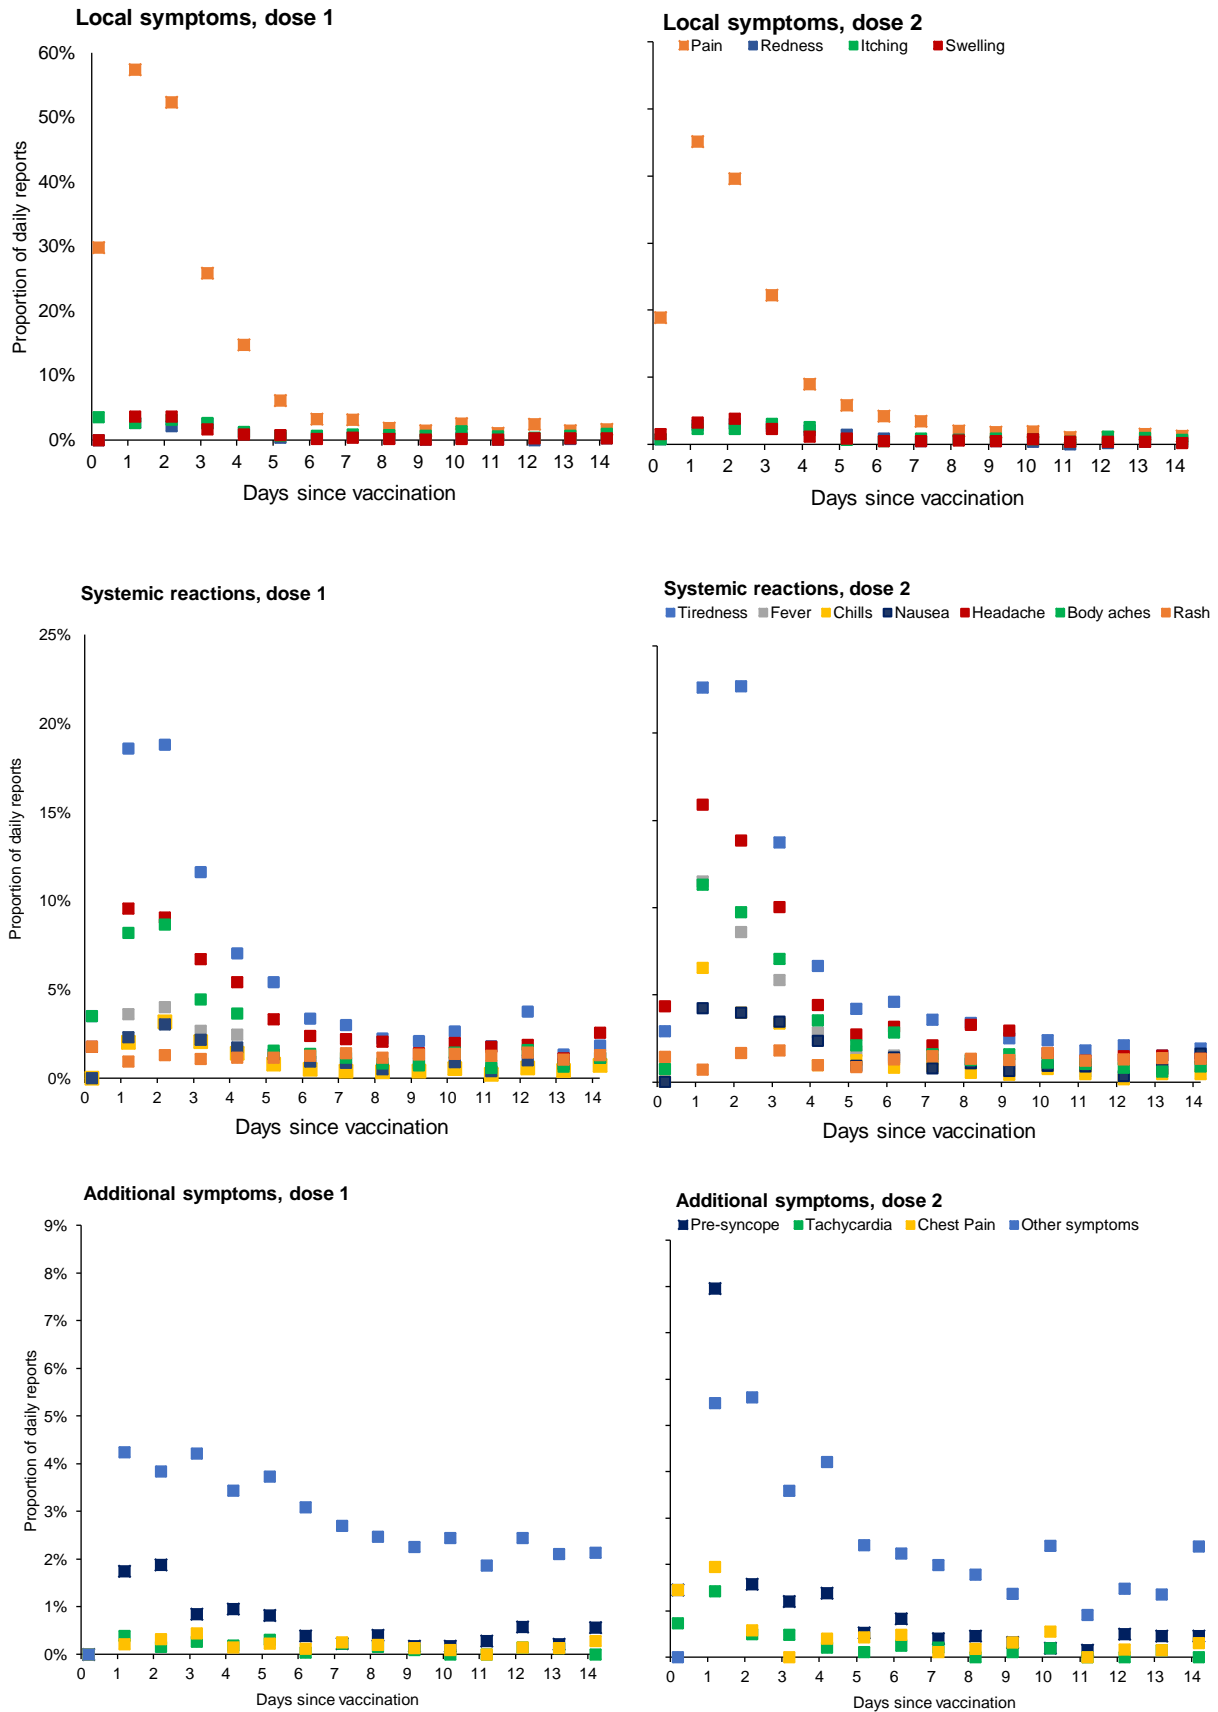

## Appendix F. Kaiser Permanente Side Effect Monitor Survey responses by dose and prior SARS-CoV-2 infection status

| Symptom                   | Dose 1                        |                             | Dose 2                        |                             |
|---------------------------|-------------------------------|-----------------------------|-------------------------------|-----------------------------|
|                           | No prior SARS-CoV-2 infection | Prior SARS-CoV-2 infection* | No prior SARS-CoV-2 infection | Prior SARS-CoV-2 infection* |
|                           | N (%)                         | N (%)                       | N                             | N                           |
| <b>All</b>                | 5,597 (100%)                  | 650 (100%)                  | 3,056 (100%)                  | 345 (100%)                  |
| <b>Any symptom*</b>       | <b>3472(62.0%)</b>            | <b>462(71.1%)</b>           | <b>1402(45.9%)</b>            | <b>199(57.7%)</b>           |
| <b>Local reaction</b>     |                               |                             |                               |                             |
| Any systemic              | 2755(49.2%)                   | 385(59.2%)                  | 963(31.5%)                    | 150(43.5%)                  |
| Pain                      | 2621(46.8%)                   | 367(56.5%)                  | 885(29.0%)                    | 143(41.4%)                  |
| Itching                   | 246(4.4%)                     | 35(5.4%)                    | 105(3.4%)                     | 14(4.1%)                    |
| Swelling                  | 181(3.2%)                     | 32(4.9%)                    | 94(3.1%)                      | 16(4.6%)                    |
| Redness                   | 161(2.9%)                     | 34(5.2%)                    | 86(2.8%)                      |                             |
| <b>Systemic reaction</b>  |                               |                             |                               |                             |
| Any systemic              | 1903(34.0%)                   | 273(42.0%)                  | 933(30.5%)                    | 143(41.4%)                  |
| Fever                     | 269(4.8%)                     | 61(9.4%)                    | 244(8.0%)                     | 48(13.9%)                   |
| Chills                    | 187(3.3%)                     | 33(5.1%)                    | 127(4.2%)                     | 28(8.1%)                    |
| Fatigue                   | 1097(19.6%)                   | 165(25.4%)                  | 559(18.3%)                    | 90(26.1%)                   |
| Myalgia                   | 510(9.1%)                     | 74(11.4%)                   | 278(9.1%)                     | 47(13.6%)                   |
| Headache                  | 660(11.8%)                    | 115(17.7%)                  | 371(12.1%)                    | 76(22.0%)                   |
| Nausea                    | 247(4.4%)                     | 41(6.3%)                    | 136(4.5%)                     | 32(9.3%)                    |
| Rash                      | 237(4.2%)                     | 31(4.8%)                    | 113(3.7%)                     | 12(3.5%)                    |
| <b>Additional symptom</b> |                               |                             |                               |                             |
| Pre-syncope               | 123(2.2%)                     | 22(3.4%)                    | 89(2.9%)                      | 18(5.2%)                    |
| Chest pain                | 35(0.6%)                      | 7(1.1%)                     | 37(1.2%)                      | 5(1.4%)                     |
| Tachycardia               | 34(0.6%)                      | 3(0.5%)                     | 21(0.7%)                      | 5(1.4%)                     |
| Other                     | 497(8.9%)                     | 85(13.1%)                   | 213(7.0%)                     | 31(9.0%)                    |

\* Number of study participants whose parents or guardians reported any of the symptoms or reactions at least once in the 0-14 days following vaccination.

† Prior COVID-19 was defined as any documentation of SARS-CoV-2 positive laboratory result of COVID-19 diagnosis in electronic health records prior to the date of vaccination, or any self-reported prior COVID-19 infection prior to or at the time of vaccination.



**APPENDIX G.** Diagnosis codes\* for medical encounters 0-21 days following BNT162b2 vaccination among participants who reported seeking medical care for post-vaccine symptoms and reported “other” symptoms (i.e., outside of the pre-selected symptoms), by dose†

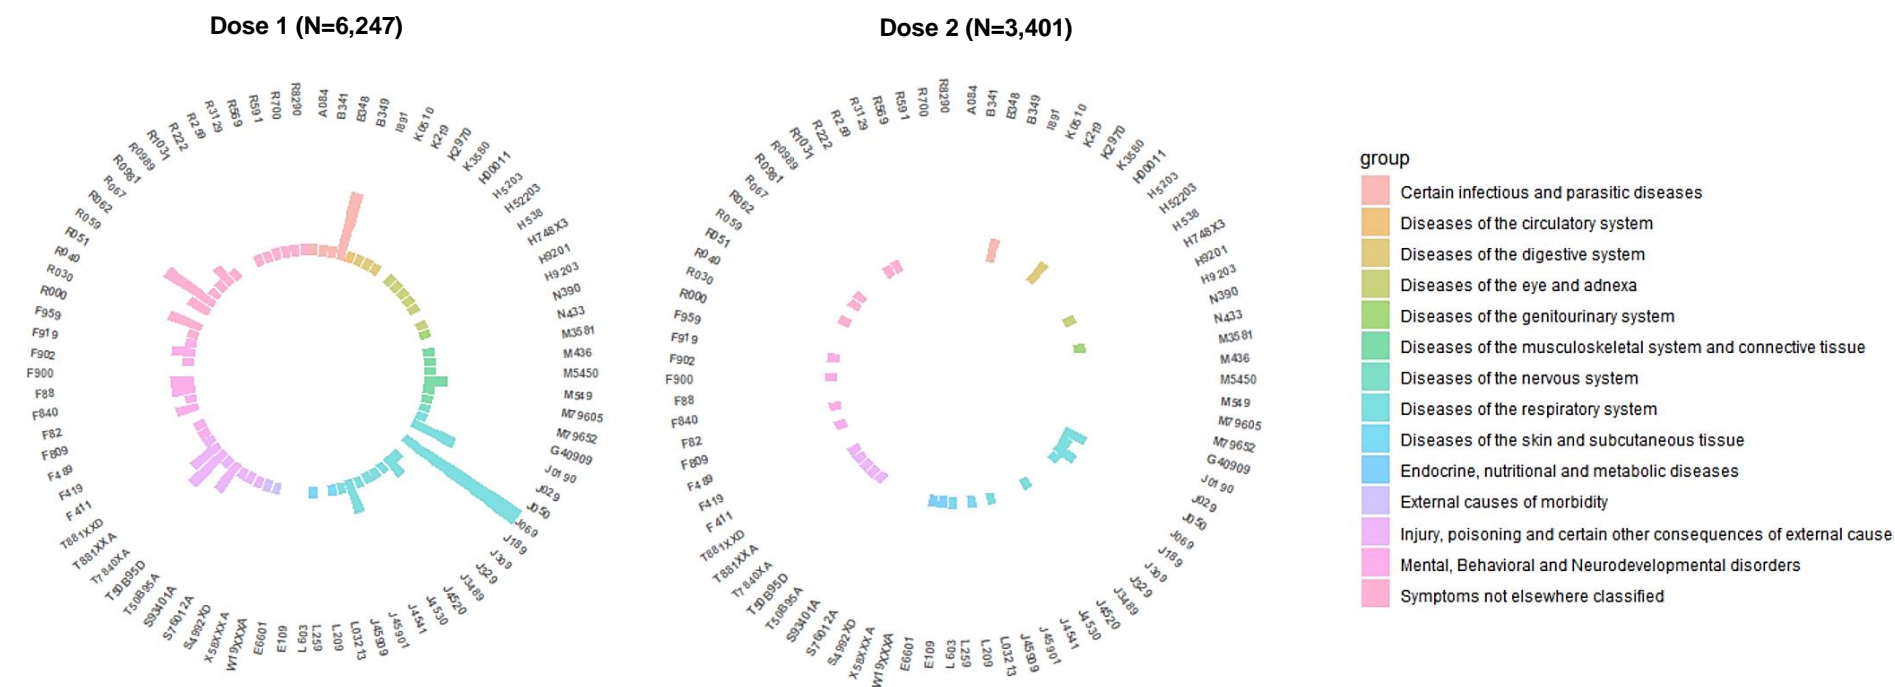

\*Pre-fixes of ICD-10 codes correspond to the following disease groups: A & B = Certain infectious and parasitic diseases; E= Endocrine, nutritional and metabolic diseases; F= Mental, Behavioral and Neurodevelopmental disorders; G = Diseases of the nervous system; H = Diseases of the eye and adnexa; I = Diseases of the circulatory system; J = Diseases of the respiratory system; K = Diseases of the digestive system; L = Diseases of the skin and subcutaneous tissue; M = Diseases of the musculoskeletal system and connective tissue; N = Diseases of the genitourinary system; R = Symptoms, signs and abnormal clinical and laboratory findings, not elsewhere classified; S= Injury, poisoning and certain other consequences of external causes; W & X = External causes of morbidity.

† A participant may be represented more than once on this chart if they have multiple diagnosis codes.
